# Supplementary material
Source: HighWire-hosted journal article supplement (https://www.cmajopen.ca/highwire/filestream/81377/field_highwire_adjunct_files/2/2019-0111-coreq-checklist.pdf)
Supplement: 2019-0111-coreq-checklist.pdf [file 2019-0111-coreq-checklist.pdf]

**Table 1**

Consolidated criteria for reporting qualitative studies (COREQ): 32-item checklist

| No                                                     | Item                    | Guide questions/description                                            |
|--------------------------------------------------------|-------------------------|------------------------------------------------------------------------|
| <b>Domain 1:<br/>Research team<br/>and reflexivity</b> |                         |                                                                        |
| Personal<br>Characteristics                            |                         |                                                                        |
| 1.                                                     | Interviewer/facilitator | Which author/s conducted the interview or focus group? Line 23         |
| 2.                                                     | Credentials             | What were the researcher's credentials?<br><i>E.g. PhD, MD</i> Line 24 |
| 3.                                                     | Occupation              | What was their occupation at the time of the study? Line 24            |
| 4.                                                     | Gender                  | Was the researcher male or female?<br>Line 24                          |
| 5.                                                     | Experience and training | What experience or training did the researcher have? Line 24           |

| No                             | Item                                     | Guide questions/description                                                                                                                                                  |
|--------------------------------|------------------------------------------|------------------------------------------------------------------------------------------------------------------------------------------------------------------------------|
| Relationship with participants |                                          |                                                                                                                                                                              |
| 6.                             | Relationship established                 | Was a relationship established prior to study commencement? Line 29                                                                                                          |
| 297.                           | Participant knowledge of the interviewer | What did the participants know about the researcher? e.g. <i>personal goals, reasons for doing the research</i> Line 29                                                      |
| 8.                             | Interviewer characteristics              | What characteristics were reported about the interviewer/facilitator? e.g. <i>Bias, assumptions, reasons and interests in the research topic</i> Line 29                     |
| <b>Domain 2: study design</b>  |                                          |                                                                                                                                                                              |
| Theoretical framework          |                                          |                                                                                                                                                                              |
| 9.                             | Methodological orientation and Theory    | What methodological orientation was stated to underpin the study? e.g. <i>grounded theory, discourse analysis, ethnography, phenomenology, content analysis</i> Lines 31, 39 |

| No                    | Item                         | Guide questions/description                                                                       |
|-----------------------|------------------------------|---------------------------------------------------------------------------------------------------|
| Participant selection |                              |                                                                                                   |
| 10.                   | Sampling                     | How were participants selected? <i>e.g. purposive, convenience, consecutive, snowball</i> Line 28 |
| 11.                   | Method of approach           | How were participants approached? <i>e.g. face-to-face, telephone, mail, email</i> Lines 26-28    |
| 12.                   | Sample size                  | How many participants were in the study? Line 45                                                  |
| 13.                   | Non-participation            | How many people refused to participate or dropped out? Reasons? Line 45                           |
| Setting               |                              |                                                                                                   |
| 14.                   | Setting of data collection   | Where was the data collected? <i>e.g. home, clinic, workplace</i> Line 23                         |
| 15.                   | Presence of non-participants | Was anyone else present besides the participants and researchers? Line 23                         |

| No              | Item                   | Guide questions/description                                                                          |
|-----------------|------------------------|------------------------------------------------------------------------------------------------------|
| 16.             | Description of sample  | What are the important characteristics of the sample? <i>e.g. demographic data, date</i> Lines 48-54 |
| Data collection |                        |                                                                                                      |
| 17.             | Interview guide        | Were questions, prompts, guides provided by the authors? Was it pilot tested? Lines 31-34            |
| 18.             | Repeat interviews      | Were repeat interviews carried out? If yes, how many? Lines 47-48                                    |
| 19.             | Audio/visual recording | Did the research use audio or visual recording to collect the data? Line 26                          |
| 20.             | Field notes            | Were field notes made during and/or after the interview or focus group? no                           |
| 21.             | Duration               | What was the duration of the interviews or focus group? Line 24                                      |
| 22.             | Data saturation        | Was data saturation discussed? no                                                                    |

| No                                          | Item                           | Guide questions/description                                                             |
|---------------------------------------------|--------------------------------|-----------------------------------------------------------------------------------------|
| 23.                                         | Transcripts returned           | Were transcripts returned to participants for comment and/or correction? no             |
| <b>Domain 3:<br/>analysis and findingsz</b> |                                |                                                                                         |
| Data analysis                               |                                |                                                                                         |
| 24.                                         | Number of data coders          | How many data coders coded the data? One (SD) Line 40-41                                |
| 25.                                         | Description of the coding tree | Did authors provide a description of the coding tree? no                                |
| 26.                                         | Derivation of themes           | Were themes identified in advance or derived from the data? Derived from data - Line 40 |
| 27.                                         | Software                       | What software, if applicable, was used to manage the data? none                         |

| No        | Item                         | Guide questions/description                                                                                                                                |
|-----------|------------------------------|------------------------------------------------------------------------------------------------------------------------------------------------------------|
| 28.       | Participant checking         | Did participants provide feedback on the findings? no                                                                                                      |
| Reporting |                              |                                                                                                                                                            |
| 29.       | Quotations presented         | Were participant quotations presented to illustrate the themes / findings? Was each quotation identified? e.g. <i>participant number</i> yes, Lines 61-151 |
| 30.       | Data and findings consistent | Was there consistency between the data presented and the findings? Yes (tables and Findings)                                                               |
| 31.       | Clarity of major themes      | Were major themes clearly presented in the findings? Yes (findings)                                                                                        |
| 32.       | Clarity of minor themes      | Is there a description of diverse cases or discussion of minor themes? Yes (findings)                                                                      |
